# Supplementary material for: Wake redirection at higher axial induction
Source: Copernicus journal article supplement (doi:10.5194/wes-2020-111), 2020-10-26
Supplement: Supplementary file [file wes-2020-111-AC1-supplement.zip]

# Wake redirection at higher axial induction

Carlo Cossu

Laboratoire d'Hydrodynamique Énergetique et Environnement Atmosphérique (LHEEA)  
CNRS - Centrale Nantes, 1 rue de la Noë 44300 Nantes, France

**Correspondence:** Carlo Cossu (carlo.cossu@ec-nantes.fr)

**Abstract.** The energy produced by wind plants can be increased by mitigating the negative effects of turbine-wakes interactions. In this context, axial induction control and wake redirection control, obtained by intentionally yawing or tilting the rotor axis away from the mean wind direction, have been the subject of extensive investigations. ~~We have recently shown that the combination of static tilt control with static axial over-induction results in significant power gains. However, these~~  
5 ~~early results were based on idealized turbine models where wake rotation effects, radial force distributions and realistic turbine controller effects were neglected~~ research but only very few investigations have considered their combined effect. In this study we ~~therefore~~ compute power gains that ~~can be~~ are obtained by operating tilted and yawed rotors at higher axial induction ~~for the more~~ by means of large eddy simulations using the realistic native NREL 5-MW ~~turbine~~ actuator disk model implemented in SOWFA. We ~~then extend this approach to the case of yaw control. We show that power gains~~ show that for the considered  
10 two-rows wind-aligned array of wind turbines the power gains, of approximately 5%, obtained by standard wake redirection based on yaw or tilt control are highly enhanced when the yawed or tilted turbines are operated at optimal tilt or yaw angles and reference axial induction can be more than tripled, to above 15%, by operating the tilted or yawed turbines at higher axial induction. ~~These results confirm our early findings for the case of tilt control and extend them to the case of yaw control suggesting an high potential for the practical application of overinductive wake redirection~~ It is also shown that significant enhancements  
15 of the power gains are obtained even for moderate overinduction. These findings confirm the potential of overinductive wake redirection highlighted by previous investigations based on more simplified turbine models that neglected wake rotation effects. The results also complement previous research on dynamic overinductive yaw control by showing that it leads to large power gain enhancements also in the case where both the yaw and the overinduction controls are static hopefully easing the rapid testing and implementation of this combined control approach.

20 *Copyright statement.* TEXT

## 1 Introduction

In wind farms, wind turbines shadowed by the wakes of other upwind turbines experience a decrease of the mean available wind speed and an increase of turbulent fluctuations resulting in decreased extracted wind power and increased fatigue loads (see Stevens and Meneveau, 2017; Porté-Agel et al., 2019, for a review). In currently installed wind farms, however, each turbine

25 is typically operated in “greedy” mode maximizing its own individual power production. As the greedy operation mode does not generally lead to the global optimal, where the energy production of the whole wind farm is maximized (see e.g. Steinbuch et al., 1988), a number of different approaches have been proposed where the collective control of all turbines is used to increase the power production of the whole wind farm by mitigating the negative effects of turbine-wake interactions (see Knudsen et al., 2015; Boersma et al., 2017, for a review). Among the many proposed approaches, two have received particular  
30 attention: axial induction control and wake redirection control which can be static (the control is steady if the incoming wind conditions are) or dynamic (the control can be unsteady even for steady incoming wind conditions).

In axial induction control the induction factors of selected (usually upwind) turbines are steered away from the greedy operation mode in order to increase the power production of other (usually downwind) turbines. While static axial induction control has not demonstrated significant power gains in realistic settings (Knudsen et al., 2015; Annoni et al., 2016), dynamic  
35 axial induction control has shown promise for significant power gains (Goit and Meyers, 2015; Munters and Meyers, 2017). In wake redirection control the intentional misalignment of rotor axes from the wind direction is used to deflect turbine wakes in the horizontal or in the vertical direction by acting on yaw or tilt angles respectively with a documented increase of the global power produced by the wind farm (Dahlberg and Medici, 2003; Medici and Alfredsson, 2006; Jiménez et al., 2010; Fleming et al., 2014, 2015; Campagnolo et al., 2016; Howland et al., 2016; Bastankhah and Porté-Agel, 2016).

40 In two recent studies (Cossu, 2020a, b) we have shown that an appropriate combination of (static) tilt and (static) axial induction control results in a significant enhancement of the global power gains obtained in spanwise-periodic wind-turbine arrays. In ~~particular~~these studies, for the considered three-rows turbine arrays, power gains were observed to be highly enhanced (up to a factor of 2 or 3) when the turbines with rotor tilted by the optimal angle ( $\varphi \approx 30^\circ$ ) were operated at disk-based thrust coefficient  $C'_T = 3$  higher than in the baseline case ( $C'_T = 1.5$ ).

45 ~~These early results~~The results reported in these previous studies (Cossu, 2020a, b) were obtained with an actuator-disk model where wake-rotation and the radial distribution of actuator-disk forces were neglected and the turbines were assumed to operate at constant given  $C'_T$ . This highly idealized setting, used in many previous investigations (e.g. Calaf et al., 2010; Goit and Meyers, 2015; Munters and Meyers, 2017), has been instrumental in obtaining general results not depending on the specific turbine control law and blade design but calls for confirmation on more realistic turbine models. Hence, a first  
50 goal of this study is to determine the power gains that can be obtained with high-induction (overinductive) tilt control when realistic turbine models are used that take into due account blade-design, wake-rotation and ~~controller specificities~~the controller specificity. This goal is addressed in the first part of this study, by making use of SOWFA’s (Churchfield et al., 2012) native actuator disk model for the NREL 5-MW turbine. In this implementation of the turbine model the radial dependence of the actuator disk force as well as wake rotation and  $C'_T$  are computed from turbine blades properties by means of a blade-element  
55 approach and NREL 5-MW’s five-region realistic controller (Jonkman et al., 2009) is used.

In the second part of the study we address the case of yaw control. Indeed, the increased power gains obtained by operating tilted turbines at higher thrust coefficients mostly result from the increase of wake deviations obtained without a penalization of the power production of the tilted turbine. Overinductive wake deflection could therefore be beneficial also in the case of yaw-control where it is known that higher thrust coefficients also result in larger wake deviations (Jiménez et al., 2010; Howland

et al., 2016; Shapiro et al., 2018). Surprisingly, however, only ~~a-very~~ few studies have investigated the potential benefits of combining axial induction control and yaw control: ~~Park and Law (2015) show that significant power gains can be obtained in this way.~~ Park and Law (2015), based on simplified wake models and advanced optimization techniques, show that significant power gains can be obtained by the combining static yaw and induction control but they do not analyze the respective effects of yaw and induction ~~while Munters and Meyers (2018b) find~~; furthermore, their optimal solutions in the aligned case converge to an underinductive operation mode for yawed turbines. Munters and Meyers (2018a, b) show, by means of adjoint methods with full-state information and an actuator disk turbine model where wake rotation is neglected, that high power gains result from the combination of ~~dynamic~~ dynamic yaw and axial induction ~~control and highlight~~ controls with Munters and Meyers (2018b) highlighting the potential of quasi-static yaw control in the (dynamic) overinductive regime. From these previous studies, thus, it is not clear if significant power gains could be realized in the overinductive regime when both the yaw and the axial induction control are static, nor to what extent the neglected wake rotation effects are important.

The second ~~, probably most important,~~ objective of the present study is therefore to ascertain if significant power gains can be obtained, with a combination of static yaw control and static axial induction control, by operating yawed turbines at higher axial induction and including the effect of wake rotation in the turbine model. An affirmative answer would allow to isolate the mean wake redirection as the most relevant physical effect at play (instead of e.g. the dynamical adaptation to the incoming wind) and that it is robust with respect to the inclusion of wake rotation effects. Furthermore, if successful, static overinductive yaw control could be easily implemented by simply updating existing yaw-control protocols with a prescription on the suitable turbine rotor-collective blade-pitch angle (controlling the axial induction and the thrust coefficient) for each accessible yaw angle.

The potential of ~~oveinductive-static~~ overinductive wake redirection will be investigated by computing power gains that can be obtained in a wind-turbine array composed of two spanwise-periodic rows of wind-aligned turbines where the same control is applied to all upwind-row turbines while downwind-row turbines are left in default operation mode. This idealized configuration, which is an extension to the spanwise-periodic case of the two-turbine configuration considered by Fleming et al. (2015), is chosen in order to keep simple the physical interpretation of the results by isolating the effects of tilt or yaw angle and axial induction of the upwind turbines without entering the problem of the optimization of these parameters ~~in-multi-row configurations encountered in more realistic configurations with more rows.~~ As such, this approach is a necessary first step needed to isolate the main trends at play before considering more realistic settings. Importantly, the relevance of these power gains will be tested without excessive assumptions by means of large-eddy simulations in the atmospheric boundary layer using a turbine model which includes the effects of wake-rotation, radial force distribution and a realistic turbine controller.

We anticipate that substantial enhancements (up to a factor of 3) of the power gains induced by wake redirection are found when operating the tilted or yawed turbines at higher axial induction.

The formulation of the problem at hand is introduced in §2. Results are reported in §3 and further discussed in §4. Additional details on used methods are provided in ~~the appendix~~ Appendix A and additional results about the effect of using a less realistic turbine model, where wake rotation effects are neglected, are reported in Appendix B.

## 2 Problem formulation

95 We address the case of two spanwise-periodic rows of wind turbines immersed in a neutral atmospheric boundary layer (ABL) at latitude  $41^\circ\text{N}$ . The flow is simulated by means of large-eddy simulations (LES) with SOWFA (~~see Appendix A and Churchfield et al., 2012~~) (the Simulator for On/Offshore Wind Farm Applications developed at NREL, see Churchfield et al., 2012) which solves the filtered Navier-Stokes equations including the Coriolis acceleration associated to Earth's rotation and the compressibility effects modeled by means of the Boussinesq approximation (see Appendix A for more details and Churchfield et al., 2012, for the explicit expression).

100 .

NREL 5-MW turbines (Jonkman et al., 2009) are considered, which are modeled with SOWFA's native actuator disk method where wake rotation, the radial distribution of aerodynamic forces and the thrust coefficient are all computed from blade properties providing a reliable descriptions of the wake structure except in the near-wake region. We also make use of SOWFA's native implementation of NREL 5-MW's realistic five-region turbine controller based on generator-torque control in the Region-II regime corresponding to the mean wind speeds considered in the following; in this regime we modify axial induction by changing the rotor-collective blade-pitch angle  $\beta$ . Higher axial inductions are obtained by enforcing negative values of  $\beta$  (see Appendix A), resulting in higher local thrust coefficients  $C'_T = 2T/(\pi \rho u_n^2 A)$   $C'_T = 2T/(\rho u_n^2 A)$ , where  $T$  is the thrust magnitude and  $u_n$  is the disk-averaged wind velocity component normal to the rotor disk of area  $A = \pi D^2/4$ .

For all the considered cases the local power coefficient  $C'_P = 2P/(\rho u_n^3 A)$  is well approximated as  $C'_P = \chi C'_T$ , with  $\chi = 0.9$ ;

110 results on  $C'_P$  trends will, therefore, not be shown in the following. The incoming flow, generated by means of a precursor simulation in a 3km x 3km domain in the absence of turbines, has a 100m-thick capping-inversion layer centered at  $H=750\text{m}$  separating the neutral boundary layer with constant potential temperature ( $\theta=300\text{K}$ ) from the geostrophic region above where the vertical potential temperature gradient is positive  $(d\theta/dz)_G = 0.03\text{K/m}$ . In the capping-inversion layer this gradient is  $(d\theta/dz)_{CI} = 0.03\text{K/m}$ . In the precursor simulation, the ABL is driven by a pressure gradient adjusted to maintain ~~an a~~

115 horizontally-averaged mean of 8m/s from the west at  $z=100\text{m}$  (a few meters above hub height  $z_h=89\text{m}$ ). In the region spanned by the turbines ( $z < 152\text{m}$ ) the streamwise mean velocity is well approximated by the logarithmic law and the vertical wind veer is less than  $4^\circ$  (see Cossu, 2020b, where the same ABL has been already considered). The streamwise turbulence intensity of the incoming wind at hub height is of 5.7% for the enforced low roughness length ( $z_0 = 0.001\text{m}$ ) typical of offshore conditions.

120 Simulations in the presence of wind turbines are repeated in the same 3km x 3km domain starting from the solution of the precursor simulation at  $t_0=20000\text{s}$ , corresponding to a well developed ABL, up to  $t_1=30000\text{s}$ . Statistics are computed starting from  $t=24000\text{s}$ , when turbine wakes are fully developed. The pressure gradient issued from the precursor simulation is enforced during the simulation with turbines and the (previously stored) ABL solution at  $x=0$  (west boundary) is used as inflow boundary condition.

125 In each (spanwise-periodic) row, turbines are spaced by  $4D$  in the spanwise direction (where  $D=126\text{m}$  is the rotor diameter) and the two rows, are spaced by  $7D$  in the streamwise direction with corresponding turbines of each row aligned with respect to the mean-wind direction (see Fig. 2, where the full computational domain is shown). Downwind-row turbines are always

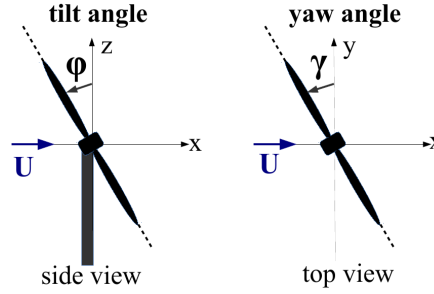

**Figure 1.** Definition of the positive rotor tilt and yaw angles  $\varphi$  and  $\gamma$  used in the present study. Positive tilt angles can be obtained for downwind-oriented rotors to avoid blade-tower hits.

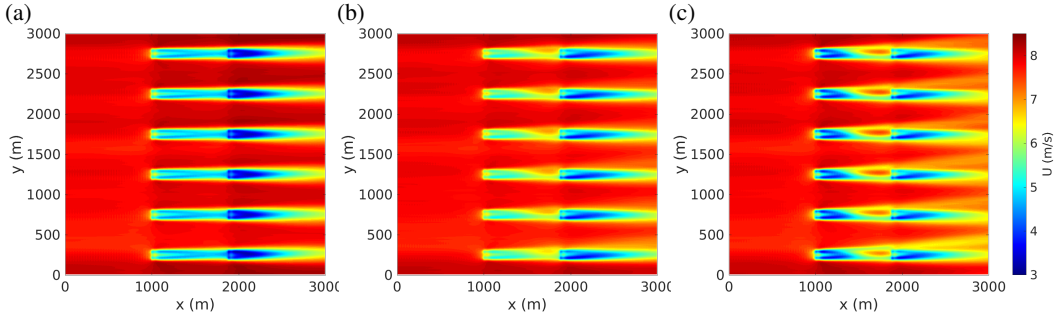

**Figure 2.** Tilt control: Mean (temporally averaged) streamwise velocity field in the horizontal plane at hub height obtained (a) in the baseline case where all turbines are operated in default mode, (b) with upwind turbines tilted by  $\varphi = 30^\circ$  and operated at the default rotor-collective blade-pitch angle  $\beta = 0^\circ$  and (c) with upwind turbines tilted by  $\varphi = 30^\circ$  and operated at higher induction ( $\beta = -5^\circ$ ). The mean wind is from the west (from the left, parallel to the  $x$  axis). Note that the entire 3km x 3km computational domain is shown in the figure and that periodic boundary conditions are applied on the north and south boundaries.

operated in default mode with the rotor axis at zero yaw angle  $\gamma = 0^\circ$  (aligned with the mean wind at  $z=100\text{m}$ ), tilt angle  $\varphi = -5^\circ$  (to prevent rotor-tower hits (see Fig. 1 for a definition of  $\varphi$  and  $\gamma$ )) and rotor-collective blade-pitch angle  $\beta = 0^\circ$ . In the baseline (reference) case upwind-row turbines are also operated in default mode. The baseline case is then compared to a set of controlled cases where all the turbines of the upwind row are operated at the same non-zero tilt or yaw angle and, possibly, non-zero pitch-angle rotor-collective blade-pitch angle.

### 3 Results

#### 3.1 Effect of overinduction on tilt control

In the baseline case (all turbines operated with  $\gamma = 0^\circ$ ,  $\varphi = -5^\circ$ ,  $\beta = 0^\circ$ ), the usual situation is found where the turbines of the downwind row see a strongly reduced mean wind (see Fig. 2a and Fig. 3b) therefore producing only  $\approx 30\%$  of the total power,

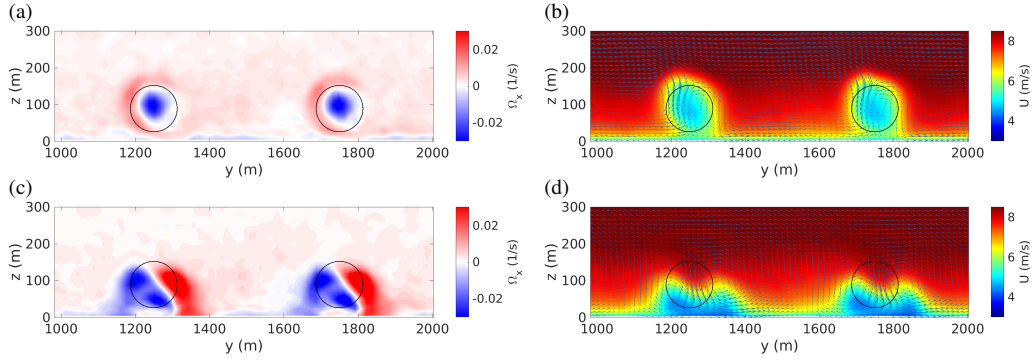

**Figure 3.** Tilt control: Cross-stream view of the mean streamwise vorticity and velocity fields in the baseline case (top panels *a* and *b*) and with upwind turbines tilted by  $\varphi = 30^\circ$  and operated at  $\beta = -5^\circ$  (bottom panels *c* and *d*). From the streamwise vorticity fields (left panels *a* and *c*), extracted 3D downstream of the first turbine row, the negative streamwise vorticity in the wake core associated to wake rotation can be clearly seen in the baseline case (panel *a*) as well as its combination with the two counter-rotating streamwise vortices forced by the tilted rotor (panel *c*). Streamwise (color scale) and cross-stream (arrows) velocity fields (right panels *b* and *d*) are extracted  $D/2$  upstream of the second row of turbines; to improve readability only the fields of the two central turbines columns (between  $y = 1000m$  and  $2000m$ ) are shown. The circles in black represent the perimeter of downstream rotors.

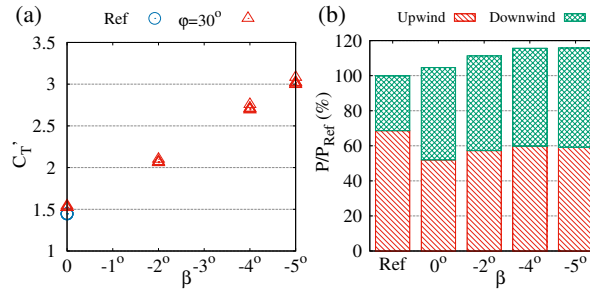

**Figure 4.** Effect of enforcing negative rotor-collective blade-pitch angles  $\beta$  on upwind-row turbines tilted by  $\varphi = 30^\circ$ . Panel (a): (temporally-averaged) local thrust coefficient  $C'_T$  of the individual turbines of the upwind row. Panel (b) wind power extracted by the upwind (hatched red) and downwind (cross-hatched green) rows of turbines normalized by the total power  $P_{Ref}$  produced in the baseline case (Ref).

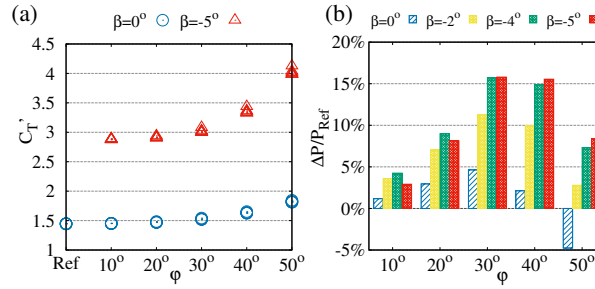

**Figure 5.** Effect of the tilt angle  $\varphi$  on: (a) the total power gain  $(P - P_{Ref})/P_{Ref}$  for selected values of  $\beta$ ; (b) the local thrust coefficients  $C'_T$  of upwind-row turbines when they are operated with  $\beta = 0^\circ$  (default axial induction) or with  $\beta = -5^\circ$  (strongly overinductive regime), (b) the total power gain  $(P - P_{Ref})/P_{Ref}$  for selected values of  $\beta$ .

i.e.  $\approx 40\%$  of the that produced by the upwind row of turbines (see Fig. 4b). The effect of wake rotation is clearly discernible in the mean streamwise vorticity field (see Fig. 3a). In the following, power gains will be computed with respect to the mean power  $P_{Ref}$  produced in this baseline case.

140 We then consider the case where upwind-row turbines are tilted by  $\varphi = 30^\circ$ , an angle in the range where best power gains have been found in previous studies (Fleming et al., 2014, 2015; Cossu, 2020a, b), while keeping their rotor-collective blade-pitch angle at the default value  $\beta = 0^\circ$ . In this case, the wakes of the upwind turbines are pushed down by the tilt-induced downwash increasing the mean wind available to downwind turbines (see Fig. 2b). The tilt-induced decrease of power produced by upwind-row turbines is compensated by the increase of the power produced by downwind-row turbines resulting in an global power gains of  $\approx 5\%$  global power gain for  $\varphi = 30^\circ$  tilt angles (see Fig. 4b).

In a further step, the rotor-collective blade-pitch angle of the tilted upwind-row turbines is changed. Enforcing increasingly negative values of  $\beta$  (i.e. increasing the mean angle of attack of all rotor blades, as explained in Appendix A) results in increased thrust coefficients (increased axial induction) which, starting from  $C'_T = 1.5$  in the baseline case ( $\beta = 0^\circ$ ), attain  $C'_T = 3$  for  $\beta = -5^\circ$  in turbines tilted by  $\varphi = 30^\circ$  (see Fig. 4a).

150 The effect of the increased thrust is twofold: it reinforces the downwash, further increasing the available wind and extracted power in downwind turbines (a) the downwash associated to the stronger tilt-induced streamwise vortices is reinforced (see Fig. 3c,d), which increases the mean wind speed seen by downstream rotors (see Fig. 2c and Fig. 3d) and their extracted power despite the higher wake deficit of upwind turbines (compare Fig. 2c to Fig. 2b) but it also (more slightly) increases and (b) the power produced by tilted turbines (is also (slightly) increased<sup>1</sup> (see Fig. 4b). The combination of these two effects results in optimal power gains which are highly enhanced (almost tripled) power gains with respect to those obtained by tilt without overinduction.

<sup>1</sup> This might be related to blockage effects which induce an increase with  $C'_T$  of the power produced by an (upwind) spanwise-periodic row of turbines as shown by Strickland and Stevens (2020) and it is not surprising given that for the NREL5 turbine  $\beta = 0^\circ$  corresponds, by design, to the maximum  $C_P$  (at the optimal wind-tip speed ratio) for an isolated non-tilted turbine but not necessarily so when  $\varphi = 30^\circ$ .



Finally, a full set of  $\varphi$ - $\beta$  combinations is considered. ~~From~~ For these simulations we observe that, for turbines operated at constant  $\beta$ , the increase of  $C'_T$  with  $\varphi$  is noticeable only for  $\varphi > 30^\circ$ , as shown in Fig. 5a (we have verified that this increment is consistent with the effects of changing the tilt angle and the associated change of the induction factor). Considering the  $(P - P_{Ref})/P_{Ref}$  power gains with respect to the baseline case, from Fig. 5b it can be seen that ~~tilt-induced the maximum~~ power gains are ~~highly-enhanced (more than doubled) even with the moderate~~ reached for  $\varphi \approx 30^\circ$  with optimal values obtained with significant overinduction (power gains larger than 15% for  $\beta \approx -5^\circ$ ) which are almost three times those ( $\approx 5\%$ ) obtained with tilt control at reference induction rates ( $\beta = 0^\circ$ ). This effect of overinduction in tilt control is very strong: from Fig. 5b it is indeed also seen that at  $\varphi = 30^\circ$ , even with the moderate rotor-collective blade-pitch angle  $\beta = -2^\circ$  ~~and that optimal  $\beta$  values do depend on  $\varphi$  ( $\beta = -2^\circ$  is the best for  $\varphi = 10^\circ$ ,  $\beta = -4^\circ$  is the best one for  $\varphi = 20^\circ$ , while  $\beta = -5^\circ$  appears well adapted for  $\varphi \gtrsim 30^\circ$ ).~~ power gains have already almost doubled with respect to standard tilt control with  $\beta = 0^\circ$ . Maximum power gains are reached for  $\varphi \approx 40^\circ$ , a value larger than the optimal  $\varphi \approx 30^\circ$  found when  $\beta = 0^\circ$ . This is probably related to the fact that for a selected fixed value of  $\beta$ , the local thrust coefficient  $C'_T$  remains almost constant with the tilt angle up to  $\varphi \approx 30^\circ$  but increases for higher values of  $\varphi$  (see b) leading to a stronger downwash which more efficiently exploits the vertical velocity gradient. Smaller values of the optimal tilt angle  $\varphi$  would probably be found if  $C'_T$  was held constant instead of  $\beta$  (as in Cossu, 2020b).

Contrary to a first intuition, increasing the local thrust coefficient  $C'_T$  is not an issue for mean turbine loads because turbines are tilted. Indeed, when turbines are tilted at the default  $\beta = 0^\circ$ , their mean load (essentially the thrust force) decreases because of the reduced incoming mean wind  $u_n$  normal to the rotor. For the considered cases, the increase of  $C'_T$  obtained with negative values of  $\beta$  counteracts this thrust decrease but the thrust magnitude remains almost unchanged (within 5%). ~~The high enhancement of power gains obtained by combining overinduction with tilt control with respect to the baseline case for  $\varphi \lesssim 30^\circ$  when optimal  $\beta$  values are used for each  $\varphi$  and is reduced for larger  $\varphi$  values (not shown). Thrust magnitudes exceed that of the baseline case by more than 5% only when a (suboptimal) excessive induction is enforced for  $\varphi \lesssim 20^\circ$ . Note also, that in tilted turbines an important part of the thrust force is directed along the (positive) vertical direction compensating the gravity force; the remaining horizontal part of the thrust force is therefore always reduced in turbines operated at the optimal  $\beta$ .~~ those obtained by standard tilt control at baseline induction is consistent with that found in our previous studies (Cossu, 2020a, b) therefore confirming the robustness of this trend. The absolute levels of power gains are, however, smaller than those reported by (Cossu, 2020a, b) both because two-rows arrays are considered here instead of the previously considered three-rows arrays (which have higher power gains, see e.g. Annoni et al., 2017) and because wake-rotation effects, neglected in the previous studies, are here taken into account (see Appendix B for further details).

### 3.2 Effect of overinduction on yaw control

~~To evaluate the effect of overinductive operation on yaw control we~~

We now evaluate the benefits of combining static yaw control with static overinduction. We proceed similarly to the tilt-control case by using the same precursor simulation and the same baseline case where all turbines operate at default values  $\gamma = 0^\circ$ ,  $\varphi = -5^\circ$ ,  $\beta = 0^\circ$ .



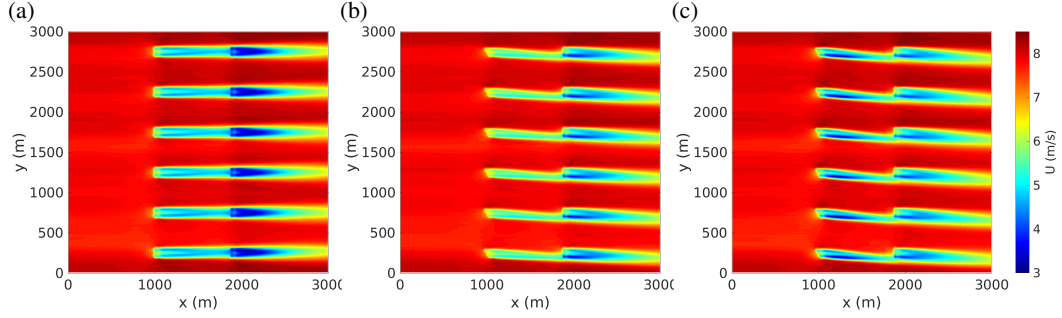

**Figure 6.** Yaw control: Mean streamwise velocity field in the horizontal plane at hub height obtained (a) in the baseline case where all turbines are operated in default mode ( $\gamma = 0^\circ$ ,  $\beta = 0^\circ$  same as Fig. 2a, reproduced here to ease the comparison), (b) in the case with upwind turbines yawed by  $\gamma = 30^\circ$  and operated at the default  $\beta = 0^\circ$  and (c) with upwind turbines yawed by  $\gamma = 30^\circ$  and operated at higher induction ( $\beta = -5^\circ$ ).

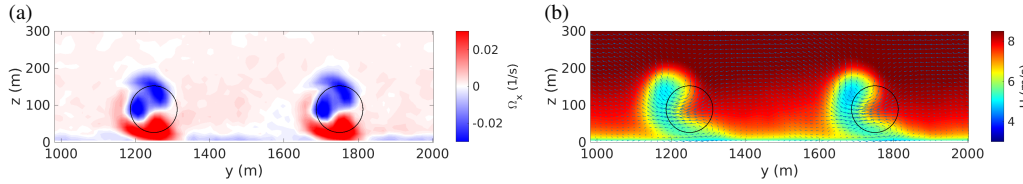

**Figure 7.** Yaw control: Cross-stream view of the mean streamwise vorticity and velocity fields with upwind turbines yawed by  $\gamma = 30^\circ$  and operated at  $\beta = -4^\circ$ . The signature of the two vertically-staked counter-rotating streamwise vortices forced by the yawed rotor combined with wake rotation is clearly visible in the streamwise vorticity field (panel a) extracted 3D downstream of the first turbine row. Their effect on the lateral displacement of the wake is clearly discernible in the streamwise (color scale) and cross-stream (arrows) velocity fields (panel b) extracted  $D/2$  upstream of the second row of turbines. Only the fields of the two central turbines columns (between  $y = 1000m$  and  $2000m$ ) are shown.

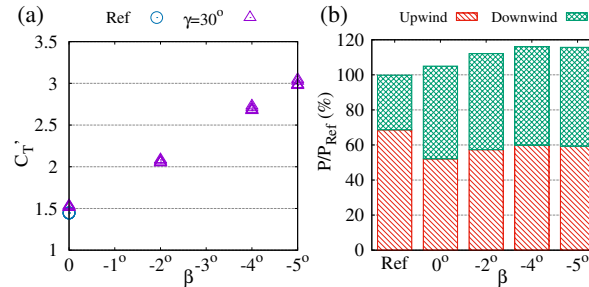

**Figure 8.** Effect of changing the rotor-collective blade-pitch angle  $\beta$  of turbines yawed by  $\gamma = 30^\circ$ . Panel (a): local thrust coefficient  $C'_T$  of the turbines of the upwind row. Panel (b): wind power extracted by the upwind (hatched red) and downwind (cross-hatched green) rows of turbines normalized by the total power  $P_{Ref}$  extracted in the baseline case.

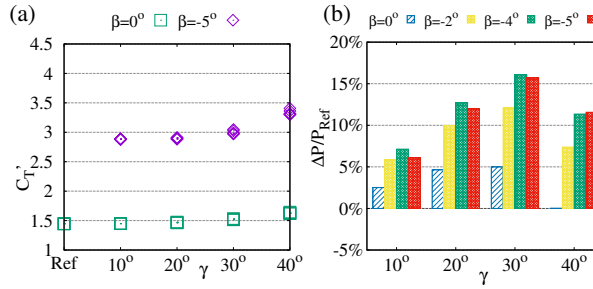

**Figure 9.** Effect of the yaw angle  $\gamma$  on: (a) the local thrust coefficients  $C_T'$  of upwind-row turbines when they are operated at  $\beta = 0^\circ$  or at  $\beta = -5^\circ$ , and (b) power gains for selected values of rotor-collective blade-pitch angle  $\beta$ .

We first simulate the standard yaw control where the yaw angle  $\gamma$  of upwind-row turbines is changed (while keeping unchanged the other parameters  $\varphi = -5^\circ$ ,  $\beta = 0^\circ$ ) resulting in the well known horizontal deviation of upwind-row turbine wakes and the increase of the mean wind speed seen by downwind rotors (see Fig. 6b). From Fig. 8b it is seen that, in this case, the increase of the power produced by downwind-row turbines compensates the reduction of the power produced by the yawed (upwind-row) resulting in maximum power gains of  $\approx 5\%$  obtained for  $\gamma = 20^\circ - 30^\circ$  (see a)  $\gamma \approx 30^\circ$ , similarly to the values found by Fleming et al. (2015) for the two-turbines case.

Increasing the local thrust coefficient  $C_T'$  by means of increasingly negative blade-pitch angles in yawed turbines (see Fig. 8a) has effects similar to those observed for the tilt-control case: an increase of wake-velocity deficits in upwind-row turbine wakes but also their higher deviation away from downwind turbines (see Fig. 6c and Fig. 7b) induced by the stronger yaw-induced vertically-staked counter-rotating streamwise vortices (see Fig. 7a) resulting in an increase of the mean power produced by all turbines (b) with respect to the standard yaw-control case with  $\beta = 0^\circ$  (Fig. 8b).

The analysis of power gains obtained with different a full range of  $\gamma$ - $\beta$  combinations, leads to results similar to those obtained for the tilt-control case. A non-negligible increase of  $C_T'$  is observed for large yaw angles  $\gamma \gtrsim 30^\circ$  when operating at constant  $\beta$ , as reported in Fig. 9a, reveals that and global power gains obtained by yaw control are highly enhanced when yawed turbines are operated at higher induction. Power gains are indeed (more negative values of the rotor-collective blade-pitch angle  $\beta$ ). Also similarly to the tilt-control case, maximum power gains are obtained for  $\gamma \approx 30^\circ$  regardless of the  $\beta$  value. Overall optimal power gains (above 15%) are reached for relatively high overinduction ( $\beta \approx -4^\circ$ ). Also in this case, power gains obtained by  $\gamma = 30^\circ$  yaw control are more than doubled already for  $\beta = -2^\circ$  and are almost tripled for the optimal yaw-pitch combination  $\gamma = 30^\circ$ , value  $\beta = -4^\circ$ .

Similarly to the tilt-control case, at higher induction the optimal yaw angles are higher ( $\gamma \approx 30^\circ$ ) than in the standard yaw-control case ( $\gamma \approx 20^\circ$  for with respect to the standard operation mode ( $\beta = 0^\circ$ )). However, differently from the tilt control case, the optimal pitch angle is not very sensitive to the yaw angle,  $\beta = -4^\circ$  being the optimal value for all considered tilt angles and the increase of  $C_T'$  observed for  $\gamma \gtrsim 30^\circ$  (see b) does not result in a shift of optimal yaw angles to values larger than  $30^\circ$  even for the highest considered  $\beta = -5^\circ$ . This can be probably explained by observing that the vertical wind shear is not

215 exploited by yaw control and thus, in the yaw-control case very large wake deviations are less beneficial than in at the same yaw angle  $\gamma = 30^\circ$ .

These results confirm the first intuition that, also in the static yaw-control case, static overinduction leads to a substantial improvement of the power gains which is based on the same mechanisms discussed for the tilt-control case confirming that these mechanisms are quite robust.

220 Effect of changing the  $\beta$  of turbines yawed by  $\gamma = 30^\circ$ . Panel (a): local thrust coefficient  $C'_T$  of the turbines of the upwind row. Panel (b): wind power extracted by the upwind (hatched red) and downwind (cross-hatched green) rows of turbines normalized by the total power  $P_{Ref}$  extracted in the baseline case. Effect of the yaw angle  $\gamma$  on (a) power gains for selected values of  $\beta$  and (b) on the local thrust coefficients  $C'_T$  of upwind-row turbines when they are operated at  $\beta = 0^\circ$  or at  $\beta = -5^\circ$ .

## 4 Conclusions

225 The main goal of this study was to assess the magnitude of global power gains that can be obtained in wind turbine arrays by combining static wake redirection control and static axial induction control operating tilted or yawed turbines at higher axial induction (overinduction). Results have been obtained by means of large-eddy simulations of a two-rows array of NREL 5MW turbines in a neutral atmospheric boundary layer.

In a first part of the study we have considered the effect of higher induction on tilt-control by using an actuator disk model less  
230 idealized than the one used in our previous studies of this approach. The results confirm that, also with this more realistic turbine model, power gains can be highly increased by operating tilted turbines at higher induction (power gains above 15% are found, to be compared to  $\approx 5\%$  obtained with default induction, for the considered set of parameters). This substantial enhancement of power gains due to the use of overinduction in tilt control is consistent with those found in our previous studies (~~the absolute level of power gains was, however, larger in Cossu (2020a, b) where three rows of turbines were considered instead of the two~~  
235 ~~rows considered here)~~. It is also found that  $\beta$  (and therefore local thrust coefficients  $C'_T$ ) maximizing global power gains do increase with the rotor tilt angle  $\varphi$  suggesting that an optimized law  $\beta(\varphi)$  depending on the specific turbine design should be used in tilt-control operation. Our result also indicate that the use of such an optimized law would also guarantee that the thrust magnitude in overinductive tilt-control does not exceed the one of the baseline case by more than 5% but the absolute levels of the power gains are smaller because of the differences in array configurations and in the used turbine models. Indeed,  
240 when included in the turbine model, wake rotation results in an inclination of the formerly vertical downwash which displaces higher-altitude higher-speed fluid towards downstream rotors and, as a consequence, a decrease of tilt-induced power gains.

In the second part of the study we have ascertained if ~~the overinductive wake redirection approach results in power gain enhancement also in the case of~~ similar power gain enhancements could be obtained by combining static overinduction with static yaw control. To this end, we have first considered the standard case where yaw-yawed turbines are operated at the  
245 standard-reference rotor-collective blade-pitch angle  $\beta = 0$  finding power gains of the order of 5%, similar to those found in ~~numerous-many~~ previous studies (e.g. Fleming et al., 2015, for the two-turbines case). We then show that a very significant

increase of power gains (almost threefold, up to  $\approx 15\%$  for the cases considered) is obtained by operating yawed turbines at higher induction, similarly to what found for tilt control.

The findings concerning the static overinductive yaw control are probably the most relevant of this study. ~~They could, indeed, provide an explanation for the high power gains found by Park and Law (2015) and Munters and Meyers (2018b) (by means advanced optimization techniques where both yaw angles and axial inductions were used as control variables) showing that similar for short-term applications because they show that significant~~ power gains can be realized with ~~simple static open-loop~~ a simple static overinductive yaw control in a realistic model (the atmospheric boundary layer with NREL 5-MW turbines simulated with SOWFA). ~~Furthermore, yaw control can be tested and applied in most of currently installed wind farms, where wake rotation effects are fully taken into account. They also probably isolate the main physical mechanisms underlying the significant power gains found by Munters and Meyers (2018b, a) by means of combined (dynamic and static) yaw and (dynamic) induction control using adjoint methods with full state information on large-eddy simulations where the turbines were modeled with a simplified actuator disk method neglecting wake rotation effects. Furthermore, static overinductive yaw control is suitable for immediate experimental testing with most existing standard horizontal axis wind turbines unlike tilt~~  
control which is promising for specifically designed future generation downwind-oriented and/or floating turbines (Bay et al., 2019; Nanos et al., 2020).

Another important result, obtained for both tilt and yaw overinductive controls, is that while maximum power gains ( $\approx 15\%$ ) are obtained for relatively large rotor-collective blade-pitch angle ( $\beta = -5^\circ$ ) for the optimal large tilt and yaw angles ( $\varphi, \gamma \approx 30^\circ$ ), significant power gains ( $\approx 10\%$ ) are already obtained for smaller values  $\beta = -2^\circ$  showing the robust beneficial effect of even moderately overinductive turbine operation.

It is also to be noted that here we have considered only two rows of turbines and for a single configuration with a small value of the  $D/\delta$  ratio of rotor diameters to the ABL thickness but that higher power gains can be expected for a larger number of turbine rows (Park and Law, 2015; Annoni et al., 2017; Cossu, 2020a) and for larger values of  $D/\delta$  (Cossu, 2020a, b).

Additional investigations are, however, necessary to further refine, in many directions, the conclusions of the present study.  
~~Quantitative refinements~~ A first important issue is to understand what are the effects of overinduction on the static and dynamic structural loads experienced by the blades of tilted and yawed turbines. A complete aeroelastic analysis based on higher-fidelity simulations making use of the actuator line method, and necessarily requiring more refined grids, would be welcome and time steps and larger computational resources, is highly desirable, especially for the largest considered values of the yaw, tilt and pitch angles where the near- and middle-wake structure is structures are probably more sensitive to details of the turbine model.  
~~Another issue is the wind direction~~ Other issues are wind direction and array configuration. The present study is limited to a two-rows array in the wind-aligned case, but it is, of course, important to evaluate power gains in arrays with many more rows also in non-aligned configurations. Such kind of analysis, where the optimal combination of tilt, yaw and pitch angles of all turbines has to be computed for a high number of wind directions and intensities, would be too computationally demanding if performed by means of large eddy simulations and is customarily based on less computationally demanding simplified sets of equations where the accurate modeling of the controlled wakes is of primary importance (see e.g. Boersma et al., 2017). In this context, an improvement of existing the results presented in the present study could be used to help in the improvement

and validation of simplified wake models in ~~high-tilt~~ moderate to high tilt/yaw and pitch angles regime would make possible a more precise prediction yaw- and pitch-angle regimes, particularly in the case of significant overinduction. Such improved models would allow for more reliable predictions of annual energy production gains obtained with overinductive yaw or tilt control for realistic wind roses and wind farm configurations by using advanced optimization methods such as those used by Park and Law (2015).

Finally, it would be very interesting to ascertain if additional power gain enhancements could come from the simultaneous activation of tilt, yaw and axial induction control. It might indeed be possible that, as a consequence of the symmetry breaking associated to wake rotation effects and Coriolis acceleration, optimal power gains are obtained with “hybrid” yaw-tilt rotor-axis rotations even in wind-aligned configurations. This is the subject of current intense research effort.

## Appendix A: Methods

~~Large-eddy simulations~~ The large-eddy simulations presented in this study are performed with SOWFA (the Simulator for On/Offshore Wind - SOWFA), a set of libraries and codes able to simulate atmospheric flows over wind turbines (Churchfield et al., 2012), that is based on ~~OpenFOAM, which solves the~~ OpenFOAM software environment designed to solve partial differential equations based on a by means of finite-volume framework spatial discretizations on unstructured meshes (Jasak, 2009; OpenCFD, 2011). The filtered Navier-Stokes equations are solved using the Smagorinsky (1963) model to approximate subgrid-scale stresses ~~Compressibility effects are included with~~ with compressibility effects accounted for by means of the Boussinesq approximation and ~~the horizontal component of Coriolis acceleration is included~~ Earth’s rotation effects accounted for by the Coriolis acceleration term in the equations (see Churchfield et al., 2012, for all details on the used formulation and for a validation of the code in t . Schumann (1975) stress boundary conditions, modeling the effect of ground roughness, are applied near the ground and slip boundary conditions are enforced at the top of the solution domain. The solutions are advanced in time using the PIMPLE scheme.

Periodic boundary conditions are applied in the  $x$  (west-east) direction for the preliminary ‘precursor’ simulations where the atmospheric boundary layer flow is computed in the absence of wind turbines in order to generate realistic inflow wind conditions (Keating et al., 2004; Tabor and Baba-Ahmadi, 2010; Churchfield et al., 2012). The mean pressure gradient is adapted in order to maintain a (horizontally-averaged) mean westerly winds of 8m/s wind at  $z = 100m$ . The time-history of the mean pressure gradient and of the solution at  $x = 0$  are stored and then used in the simulations with wind turbines which are run in the same domain with the same grid but removing the periodicity constraint in the streamwise direction and replacing it with an inflow condition enforcing the solution found  $x = 0$  in the precursor simulation. Periodic boundary conditions are applied in the  $y$  (south-north) direction for both precursor simulations and simulations with turbines.

The solution domain extends 1km in the vertical direction and 3km x 3km along the  $x$  and  $y$  axes and is discretized with cells extending 15m x 15m in the  $x$  and  $y$  directions and 7m (near the ground) to 21m (near the top boundary) in the vertical direction.  $\Delta t = 0.8s$  time steps are used to advance the solution. These parameters keep manageable the amount of data stored in the precursor simulation.

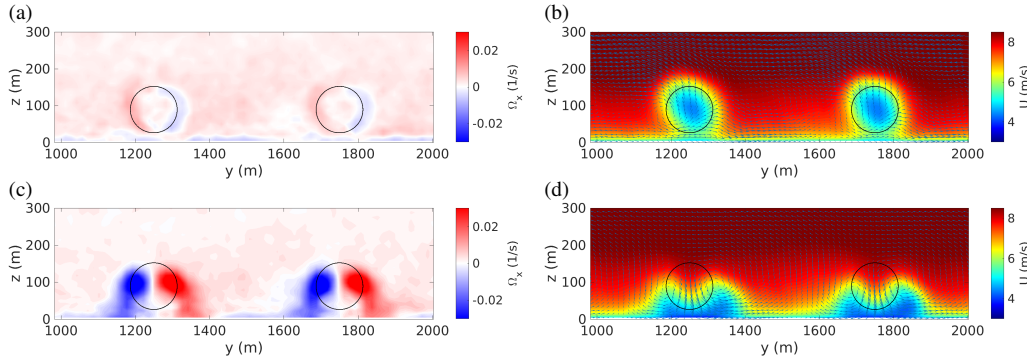

**Figure B1. Tilt control:** Cross-stream view of the mean streamwise vorticity and velocity fields obtained by using the ADMC turbine model in the baseline case where all turbines are operated at  $C'_T = 1.5$  with no tilt or yaw (top panels *a* and *b*) and with upwind turbines tilted by  $\varphi = 30^\circ$  and operated at  $C'_T = 3$  (bottom panels *c* and *d*). The streamwise vorticity fields (panels *a* and *c*) are extracted 3D downstream of the first turbine row, while the streamwise velocity fields (panels *b* and *d*) are extracted  $D/2$  upstream of the second row of turbines.

315 ~~The aerodynamics forces~~ The aerodynamic forces developing on NREL 5-MW turbines, having a  $D=126\text{m}$  rotor diameter and  $z_h=89\text{m}$  hub height (Jonkman et al., 2009), are modeled with SOWFA's native actuator disk method ~~where aerodynamic forces are computed from the characteristics of~~ based on the blade-element method (BEM). The forces exerted on the fluid are computed for each radial blade section by using the lift and drag coefficients  $c_L(\alpha)$ ,  $c_D(\alpha)$  associated to the local NREL 5-MW blade profiles ~~, rotational speed and the resolved wind velocity.~~ A and the local angle of attack  $\alpha = \phi - (\theta + \beta)$

320 computed as the difference between the angle  $\phi$  formed by the relative wind seen by the blades with the rotor plane and the local pitch angle which is the sum of the local twist angle  $\theta$  of the blades and the rotor-collective blade-pitch angle  $\beta$  (the reader is referred to e.g. Burton et al., 2001; Sørensen, 2011, for a detailed discussion of turbines modeling in general and of the BEM). The Gaussian projection of the discretized body forces proposed by Sørensen and Shen (2002) is also used with a smoothing parameter  $\varepsilon = 20\text{m}$  ~~is also used~~ to avoid numerical instabilities (Martínez-Tossas and Leonardi, 2013).

325 The NREL 5-MW five-region controller implemented in SOWFA is used to control the turbines rotational speed and axial induction. In the Region II regime, the one accessed in the presented simulation, the turbine is driven to the design point (tip-speed ratio and thrust coefficient corresponding to the maximum power coefficient for an isolated non-tilted non-yawed turbine) by means of generator-torque control at the default rotor-collective blade-pitch angle  $\beta = 0^\circ$ . In this regime, ~~the static~~ we enforce the axial induction control ~~is applied~~ by changing the rotor-collective blade-pitch angle  $\beta$  while leaving unchanged

330 the other parameters of the generator torque controller.

The local thrust coefficient is retrieved from the computed turbine thrust magnitude and rotor-averaged normal mean wind speed  $u_n$  by making use of its definition  $C'_T = 8T/\pi\rho u_n^2 D^2$ .

## Appendix B: Effect of the used turbine model on tilt-control

335 A quantitative analysis of the effect of the improved ADM model used in the present study by means of a direct comparison with the results obtained in Cossu (2020b) is not possible due to the difference of the considered array configurations (two arrays here, three in Cossu (2020b)). Additional simulations of tilt-control have therefore been performed by using the same turbine model (ADMC) used in Cossu (2020b) for the same array configuration used in the present study. We recall that, contrary to SOWFA's ADM used in the present study, in the ADCM model wake rotation effects are neglected and a uniform load is assumed over the rotor disk that is assumed to operate at constant  $C'_T$ .

340 First a baseline case has been simulated with all turbines operated at the reference values  $C'_T = 1.5$ ,  $\varphi = -5^\circ$ ,  $\gamma = 0^\circ$ . Then, a standard tilt-control case has been considered with upwind-row turbines operated at  $C'_T = 1.5$ ,  $\varphi = 30^\circ$  (and  $\gamma = 0^\circ$ ) obtaining a power gain  $\Delta P/P_{Ref} \approx 11\%$ . Finally, overinductive tilt control has been tested by operating at  $C'_T = 3$  the upwind row turbines tilted by  $\varphi = 30^\circ$  obtaining a power gain of  $\approx 27\%$ .

For the 2-rows array layout, therefore, the ADCM model also predicts that power gains obtained by overinductive tilt control are much larger than those obtained by standard tilt control (by a factor of  $\approx 240\%$  for the ADCM turbine model and by a factor of  $\approx 330\%$  with SOWFA's ADM for  $\varphi = 30^\circ$ ). However, the absolute levels of power gains computed with the ADCM model are higher than those computed with SOWFA's ADM turbine model. In this context, the effect of wake rotation appears to be important. In the ADCM model which applies a uniformly distributed force purely normal to the rotor disk, wake rotation effects are indeed neglected, resulting in a negligible mean axial vorticity in the rotor wake in the baseline case and in almost-symmetric counter-rotating vortices in the tilted case (see Fig. B1a and c). In the ADCM tilted case, therefore, the downwash associated to the tilt-induced streamwise vortices is purely vertical resulting in a highly efficient displacement of higher-altitude higher-momentum fluid towards the downstream-rotor swept area (see Fig. B1d). In the case of the SOWFA's ADM more realistic turbine model, on the contrary, wake rotation effects are fully taken into account, resulting in non-negligible mean axial vorticity in the rotor wake in the baseline case and in strongly non-symmetric counter-rotating vortices in the tilted case (see Fig. 3a and c). In the more realistic case, therefore, the tilt-induced streamwise vortices are associated to an oblique downwash which is less efficient in displacing high-momentum fluid towards the downstream rotors (see Fig. 3d). This explains that lower absolute values of tilt-induced power gains are obtained when wake-rotation effects are taken into due account.

*Competing interests.* The author declares no conflict of interest.

360 *Acknowledgements.* I gratefully acknowledge the use of the Simulator for On/Offshore Wind Farm Applications (SOWFA) developed at NREL (Churchfield et al., 2012) based on the OpenFOAM finite volume framework (Jasak, 2009; OpenCFD, 2011).



## References

- Annoni, J., Gebraad, P. M. O., Scholbrock, A. K., Fleming, P. A., and van Wingerden, J.-W.: Analysis of Axial-Induction-Based Wind Plant Control Using an Engineering and a High-Order Wind Plant Model, *Wind Energy*, 19, 1135–1150, <https://doi.org/10.1002/we.1891>, 2016.
- 365 Annoni, J., Scholbrock, A., Churchfield, M., and Fleming, P. A.: Evaluating Tilt for Wind Plants, in: 2017 American Control Conference (ACC), pp. 717–722, IEEE, IEEE, Seattle, WA, USA, <https://doi.org/10.23919/ACC.2017.7963037>, 2017.
- Bastankhah, M. and Porté-Agel, F.: Experimental and Theoretical Study of Wind Turbine Wakes in Yawed Conditions, *J. Fluid Mech.*, 806, 506–541, <https://doi.org/10.1017/jfm.2016.595>, 2016.
- Bay, C. J., Annoni, J., Martínez-Tossas, L. A., Pao, L. Y., and Johnson, K. E.: Flow Control Leveraging Downwind Rotors for Improved  
370 Wind Power Plant Operation, in: 2019 American Control Conference (ACC), pp. 2843–2848, IEEE, 2019.
- Boersma, S., Doekemeijer, B., Gebraad, P., Fleming, P., Annoni, J., Scholbrock, A., Frederik, J., and van Wingerden, J.-W.: A tutorial on control-oriented modeling and control of wind farms, in: 2017 American Control Conference (ACC), pp. 1–18, IEEE, <https://doi.org/10.23919/ACC.2017.7962923>, 2017.
- Burton, T., Jenkins, N., Sharpe, D., and Bossanyi, E.: *Wind energy handbook*, John Wiley & Sons, 2001.
- 375 Calaf, M., Meneveau, C., and Meyers, J.: Large Eddy Simulation Study of Fully Developed Wind-Turbine Array Boundary Layers, *Phys. Fluids*, 22, 015 110, <https://doi.org/10.1063/1.3291077>, 2010.
- Campagnolo, F., Petrović, V., Schreiber, J., Nanos, E. M., Croce, A., and Bottasso, C. L.: Wind Tunnel Testing of a Closed-Loop Wake Deflection Controller for Wind Farm Power Maximization, *J. Phys. Conf. Ser.*, 753, 032 006, <https://doi.org/10.1088/1742-6596/753/3/032006>, 2016.
- 380 Churchfield, M. J., Lee, S., Michalakes, J., and Moriarty, P. J.: A Numerical Study of the Effects of Atmospheric and Wake Turbulence on Wind Turbine Dynamics, *J. Turbul.*, 13, N14, <https://doi.org/10.1080/14685248.2012.668191>, 2012.
- Cossu, C.: Replacing wakes with streaks in wind turbine arrays, *Wind Energy*, pp. 1–12, <https://doi.org/10.1002/we.2577>, 2020a.
- Cossu, C.: Evaluation of tilt control for wind-turbine arrays in the atmospheric boundary layer, *Wind Energy Sci.* (sub judice), <https://doi.org/10.5194/wes-2020-106>, 2020b.
- 385 Dahlberg, J. Å. and Medici, D.: Potential improvement of wind turbine array efficiency by active wake control (AWC), in: Proc. European Wind Energy Conference, European Wind Energy Association, Madrid, Spain, 2003.
- Fleming, P., Gebraad, P. M., Lee, S., van Wingerden, J.-W., Johnson, K., Churchfield, M., Michalakes, J., Spalart, P., and Moriarty, P.: Simulation Comparison of Wake Mitigation Control Strategies for a Two-Turbine Case, *Wind Energy*, 18, 2135–2143, <https://doi.org/10.1002/we.1810>, 2015.
- 390 Fleming, P. A., Gebraad, P. M., Lee, S., van Wingerden, J.-W., Johnson, K., Churchfield, M., Michalakes, J., Spalart, P., and Moriarty, P.: Evaluating Techniques for Redirecting Turbine Wakes Using SOWFA, *Renew. Energy*, 70, 211–218, <https://doi.org/10.1016/j.renene.2014.02.015>, 2014.
- Goit, J. P. and Meyers, J.: Optimal Control of Energy Extraction in Wind-Farm Boundary Layers, *J. Fluid Mech.*, 768, 5–50, <https://doi.org/10.1017/jfm.2015.70>, 2015.
- 395 Howland, M. F., Bossuyt, J., Martínez-Tossas, L. A., Meyers, J., and Meneveau, C.: Wake Structure in Actuator Disk Models of Wind Turbines in Yaw under Uniform Inflow Conditions, *J. Renew. Sustain. Energy*, 8, 043 301, <https://doi.org/10.1063/1.4955091>, 2016.
- Jasak, H.: OpenFOAM: open source CFD in research and industry, *Int. J. Naval Arch.Oc. Eng.*, 1, 89–94, 2009.

- Jiménez, A., Crespo, A., and Migoya, E.: Application of a LES Technique to Characterize the Wake Deflection of a Wind Turbine in Yaw, *Wind Energy*, 13, 559–572, <https://doi.org/10.1002/we.380>, 2010.
- 400 Jonkman, J., Butterfield, S., Musial, W., and Scott, G.: Definition of a 5-MW reference wind turbine for offshore system development, Technical Paper NREL/TP-500-38060, National Renewable Energy Lab.(NREL), Golden, CO (United States), 2009.
- Keating, A., Piomelli, U., Balaras, E., and Kaltenbach, H.-J.: A priori and a posteriori tests of inflow conditions for large-eddy simulation, *Phys. fluids*, 16, 4696–4712, <https://doi.org/10.1063/1.1811672>, 2004.
- Knudsen, T., Bak, T., and Svenstrup, M.: Survey of wind farm control-power and fatigue optimization: Survey of wind farm control, *Wind*  
 405 *Energy*, 18, 1333–1351, <https://doi.org/10.1002/we.1760>, 2015.
- Martínez-Tossas, L. and Leonardi, S.: Wind Turbine Modeling for Computational Fluid Dynamics, Subcontract Report NREL/SR-5000-55054, US National Renewable Energy Laboratory, Golden, CO (USA), 2013.
- Medici, D. and Alfredsson, P. H.: Measurements on a Wind Turbine Wake: 3D Effects and Bluff Body Vortex Shedding, *Wind Energy*, 9, 219–236, <https://doi.org/10.1002/we.156>, 2006.
- 410 Munters, W. and Meyers, J.: An Optimal Control Framework for Dynamic Induction Control of Wind Farms and Their Interaction with the Atmospheric Boundary Layer, *Philos. Trans. R. Soc. Math. Phys. Eng. Sci.*, 375, 20160 100, <https://doi.org/10.1098/rsta.2016.0100>, 2017.
- Munters, W. and Meyers, J.: Optimal Dynamic Induction and Yaw Control of Wind Farms: Effects of Turbine Spacing and Layout, *J. Phys. Conf. Ser.*, 1037, 032 015, <https://doi.org/10.1088/1742-6596/1037/3/032015>, 2018a.
- Munters, W. and Meyers, J.: Dynamic Strategies for Yaw and Induction Control of Wind Farms Based on Large-Eddy Simulation and  
 415 Optimization, *Energies*, 11, 177, <https://doi.org/10.3390/en11010177>, 2018b.
- Nanos, E. M., Letizia, S., Barreiro, D. J., Wang, C., Rotea, M., Iungo, V. I., and Bottasso, C. L.: Vertical wake deflection for offshore floating wind turbines by differential ballast control, in: *J. Phys: Conf. Series*, vol. 1618, p. 022047, IOP Publishing, <https://doi.org/10.1088/1742-6596/1618/2/022047>, 2020.
- OpenCFD: OpenFOAM - The Open Source CFD Toolbox – User’s Guide, OpenCFD Ltd., UK, 2.4 edn., <http://www.openfoam.org>, 2011.
- 420 Park, J. and Law, K. H.: Cooperative Wind Turbine Control for Maximizing Wind Farm Power Using Sequential Convex Programming, *Energy Convers. Manag.*, 101, 295–316, <https://doi.org/10.1016/j.enconman.2015.05.031>, 2015.
- Porté-Agel, F., Bastankhah, M., and Shamsoddin, S.: Wind-Turbine and Wind-Farm Flows: A Review, *Bound.-Layer Meteorol.*, <https://doi.org/10.1007/s10546-019-00473-0>, 2019.
- Schumann, U.: Subgrid scale model for finite difference simulations of turbulent flows in plane channels and annuli, *J. Comp. Phys.*, 18,  
 425 376–404, [https://doi.org/10.1016/0021-9991\(75\)90093-5](https://doi.org/10.1016/0021-9991(75)90093-5), 1975.
- Shapiro, C. R., Gayme, D. F., and Meneveau, C.: Modelling Yawed Wind Turbine Wakes: A Lifting Line Approach, *J. Fluid Mech.*, 841, <https://doi.org/10.1017/jfm.2018.75>, 2018.
- Smagorinsky, J.: General circulation experiments with the primitive equations: I. The basic experiment, *Mon. Weather Rev.*, 91, 99–164, [https://doi.org/10.1175/1520-0493\(1963\)091<0099:GCEWTP>2.3.CO;2](https://doi.org/10.1175/1520-0493(1963)091<0099:GCEWTP>2.3.CO;2), 1963.
- 430 Sørensen, J. N.: Aerodynamic Aspects of Wind Energy Conversion, *Annu. Rev. Fluid Mech.*, 43, 427–448, <https://doi.org/10.1146/annurev-fluid-122109-160801>, 2011.
- Sørensen, J. N. and Shen, W. Z.: Numerical Modeling of Wind Turbine Wakes, *J. Fluids Eng.*, 124, 393–399, <https://doi.org/10.1115/1.1471361>, 2002.
- Steinbuch, M., De Boer, W., Bosgra, O., Peeters, S., and Ploeg, J.: Optimal control of wind power plants, *J. Wind Eng. Ind. Aerodyn.*, 27,  
 435 237–246, 1988.

- Stevens, R. J. and Meneveau, C.: Flow Structure and Turbulence in Wind Farms, *Annu. Rev. Fluid Mech.*, 49, 311–339, <https://doi.org/10.1146/annurev-fluid-010816-060206>, <http://www.annualreviews.org/doi/10.1146/annurev-fluid-010816-060206>, 2017.
- Strickland, J. M. I. and Stevens, R. J. A. M.: Effect of Thrust Coefficient on the Flow Blockage Effects in Closely-Spaced Spanwise-Infinite Turbine Arrays, *J. Phys. Conf. Ser.*, 1618, 062069, <https://doi.org/10.1088/1742-6596/1618/6/062069>, 2020.
- 440 Tabor, G. R. and Baba-Ahmadi, M. H.: Inlet conditions for large eddy simulation: A review, *Computers & Fluids*, 39, 553–567, <https://doi.org/10.1016/j.compfluid.2009.10.007>, 2010.
